# Supplementary material for: New Progress on London Dispersive Energy, Polar Surface Interactions, and Lewis’s Acid–Base Properties of Solid Surfaces
Source: MDPI journal article supplement (doi:10.3390/molecules29050949), 2024-02-21
Supplement: s1 [file s1]

## Supplementary Materials

# New Progress on London Dispersive Energy, Polar Surface Interactions, and Lewis's Acid–Base Properties of Solid Surfaces

Tayssir Hamieh<sup>1,2</sup>

<sup>1</sup>Faculty of Science and Engineering, Maastricht University, P.O. Box 616, 6200 MD Maastricht, Netherlands

<sup>2</sup>Laboratory of Materials, Catalysis, Environment and Analytical Methods Laboratory (MCEMA), Faculty of Sciences, Lebanese University, Hadath, Lebanon

Correspondence: Faculty of Science and Engineering, Maastricht University, P.O. Box 616, 6200 MD Maastricht, The Netherlands, E-mail: [t.hamieh@maastrichtuniversity.nl](mailto:t.hamieh@maastrichtuniversity.nl)

**Table S1.** Values (in kJ/mol) of London dispersive energy ( $-\Delta G_a^d(T)$ ) of n-alkanes and polar solvents adsorbed on silica particles at different temperatures.

| Temperature T (K) | 323.15 | 343.15 | 363.15 | 383.15 | 403.15 |
|-------------------|--------|--------|--------|--------|--------|
| C5                | 19.780 | 19.780 | 18.187 | 16.600 | 15.444 |
| C6                | 23.409 | 23.409 | 21.524 | 19.646 | 18.277 |
| C7                | 26.534 | 26.534 | 24.397 | 22.269 | 20.718 |
| C8                | 30.814 | 30.814 | 28.333 | 25.861 | 24.060 |
| C9                | 33.503 | 33.503 | 30.805 | 28.117 | 26.159 |
| CCl4              | 24.557 | 22.516 | 20.703 | 18.896 | 17.580 |
| Nitromethane      | 16.440 | 15.074 | 13.860 | 12.651 | 11.770 |
| CH2Cl2            | 16.229 | 14.880 | 13.682 | 12.488 | 11.618 |
| CHCl3             | 19.992 | 18.330 | 16.854 | 15.383 | 14.312 |
| Diethyl ether     | 19.744 | 18.102 | 16.645 | 15.192 | 14.134 |
| THF               | 17.029 | 15.613 | 14.356 | 13.103 | 12.191 |
| Ethyl Acetate     | 19.548 | 17.923 | 16.480 | 15.042 | 13.994 |
| Acetone           | 13.404 | 12.289 | 11.300 | 10.314 | 9.595  |
| Acetonitrile      | 10.305 | 9.449  | 8.688  | 7.930  | 7.377  |
| Toluene           | 23.754 | 21.779 | 20.025 | 18.278 | 17.005 |
| Benzene           | 21.295 | 19.525 | 17.953 | 16.386 | 15.245 |

**Table S2.** Values (in kJ/mol) of London dispersive energy ( $-\Delta G_a^{sp}(T)$ ) of polar solvents adsorbed on silica particles at different temperatures.

| Temperature T(K) | 323.15 | 343.15 | 363.15 | 383.15 | 403.15 |
|------------------|--------|--------|--------|--------|--------|
| CCl4             | 6.752  | 6.810  | 6.881  | 6.968  | 7.129  |
| Nitromethane     | 13.573 | 12.367 | 11.273 | 10.191 | 9.378  |
| CH2Cl2           | 22.490 | 21.846 | 21.269 | 20.716 | 20.287 |
| CHCl3            | 19.752 | 19.304 | 18.925 | 18.546 | 18.250 |
| Diethyl ether    | 26.838 | 25.462 | 23.802 | 22.314 | 20.676 |
| THF              | 35.506 | 32.787 | 30.435 | 27.908 | 25.593 |
| Ethyl Acetate    | 4.566  | 4.015  | 3.530  | 3.079  | 2.732  |
| Acetone          | 10.612 | 9.608  | 8.703  | 7.816  | 7.144  |
| Acetonitrile     | 16.734 | 15.304 | 14.016 | 12.738 | 11.793 |
| Toluene          | 17.330 | 16.724 | 16.168 | 15.598 | 15.187 |
| Benzene          | 5.640  | 5.170  | 4.745  | 4.328  | 4.026  |

**Table S3.** Values (in kJ/mol) of London dispersive energy ( $-\Delta G_a^d(T)$ ) of n-alkanes and polar solvents adsorbed on MgO particles at different temperatures.

| Temperature (K) | 323.15 | 343.15 | 363.15 | 383.15 |
|-----------------|--------|--------|--------|--------|
| C6              | 19.996 | 19.127 | 18.299 | 17.531 |
| C7              | 22.673 | 21.688 | 20.748 | 19.877 |
| C8              | 26.336 | 25.192 | 24.100 | 23.089 |
| C9              | 28.638 | 27.394 | 26.207 | 25.107 |
| CH2Cl2          | 12.689 | 12.138 | 11.612 | 11.125 |
| CHCl3           | 15.630 | 14.951 | 14.303 | 13.703 |
| Diethyl ether   | 15.479 | 14.806 | 14.165 | 13.570 |
| THF             | 13.353 | 12.773 | 12.220 | 11.707 |
| Ethyl Acetate   | 15.313 | 14.648 | 14.013 | 13.425 |
| Acetone         | 10.505 | 10.048 | 9.613  | 9.210  |
| Acetonitrile    | 8.048  | 7.699  | 7.365  | 7.056  |
| Toluene         | 18.645 | 17.835 | 17.062 | 16.346 |

**Table S4.** Values (in kJ/mol) of London dispersive energy ( $-\Delta G_a^{sp}(T)$ ) of polar solvents adsorbed on MgO particles at different temperatures.

| T(K)          | 323.15 | 343.15 | 363.15 | 383.15 |
|---------------|--------|--------|--------|--------|
| CH2Cl2        | 3.312  | 3.786  | 4.532  | 5.211  |
| CHCl3         | 5.833  | 2.693  | 1.560  | 2.176  |
| Diethyl ether | 14.415 | 16.559 | 18.671 | 20.721 |
| THF           | 23.053 | 25.004 | 26.928 | 28.797 |
| Ethyl Acetate | 6.224  | 7.620  | 9.112  | 10.523 |
| Acetone       | 15.723 | 20.520 | 25.354 | 30.243 |

|              |        |        |        |        |
|--------------|--------|--------|--------|--------|
| Acetonitrile | 24.370 | 26.000 | 27.633 | 29.269 |
| Toluene      | 10.771 | 10.471 | 10.192 | 9.945  |

**Table S5.** Values (in kJ/mol) of London dispersive energy ( $-\Delta G_a^d(T)$ ) of n-alkanes and polar solvents adsorbed on ZnO particles at different temperatures.

| <b>T(K)</b>   | 323.15  | 343.15  | 363.15  | 383.15  |
|---------------|---------|---------|---------|---------|
| C6            | 12.6777 | 11.3464 | 10.2409 | 9.2860  |
| C7            | 14.4122 | 12.8988 | 11.6421 | 10.5565 |
| C8            | 16.7694 | 15.0085 | 13.5462 | 12.2831 |
| C9            | 18.2572 | 16.3401 | 14.7481 | 13.3728 |
| DCM           | 7.9317  | 7.0988  | 6.4071  | 5.8097  |
| TCM           | 9.7642  | 8.7389  | 7.8875  | 7.1520  |
| Diethyl ether | 9.8951  | 8.8560  | 7.9932  | 7.2478  |
| THF           | 8.5518  | 7.6537  | 6.9080  | 6.2639  |
| Ethyl Acetate | 9.7236  | 8.7025  | 7.8546  | 7.1222  |
| Benzene       | 10.7177 | 9.5922  | 8.6577  | 7.8504  |

**Table S6.** Values (in kJ/mol) of London dispersive energy ( $-\Delta G_a^{sp}(T)$ ) of polar solvents adsorbed on ZnO particles at different temperatures.

| <b>T(K)</b>   | <b>323.15</b> | <b>343.15</b> | <b>363.15</b> | <b>383.15</b> |
|---------------|---------------|---------------|---------------|---------------|
| DCM           | 2.449         | 1.915         | 1.223         | 0.632         |
| TCM           | 1.151         | 1.061         | 0.999         | 0.933         |
| Diethyl ether | 7.721         | 7.045         | 6.594         | 6.037         |
| THF           | 13.596        | 12.901        | 12.294        | 11.517        |
| Ethyl Acetate | 3.955         | 2.715         | 1.800         | 1.042         |
| Benzene       | 0.870         | 0.690         | 0.537         | 0.354         |

**Table S7.** Values (in kJ/mol) of London dispersive energy ( $-\Delta G_a^d(T)$ ) of n-alkanes and polar solvents adsorbed on monogal-Zn particles at different temperatures.

| <b>T (K)</b>  | 323.15 | 343.15 | 363.15 | 383.15 |
|---------------|--------|--------|--------|--------|
| C6            | 25.249 | 23.667 | 21.355 | 18.899 |
| C7            | 28.600 | 26.809 | 24.189 | 21.408 |
| C8            | 33.199 | 31.119 | 28.078 | 24.850 |
| C9            | 36.084 | 33.823 | 30.518 | 27.009 |
| DCM           | 16.113 | 15.103 | 13.628 | 12.061 |
| TCM           | 16.610 | 15.570 | 14.048 | 12.433 |
| Diethyl ether | 15.260 | 14.304 | 12.906 | 11.422 |
| THF           | 15.156 | 14.206 | 12.818 | 11.344 |

|               |        |        |        |        |
|---------------|--------|--------|--------|--------|
| Ethyl Acetate | 19.324 | 18.114 | 16.344 | 14.464 |
| Acetone       | 15.412 | 14.447 | 13.035 | 11.536 |
| Acetonitrile  | 17.138 | 16.064 | 14.494 | 12.828 |
| Toluene       | 14.696 | 13.775 | 12.429 | 11.000 |

**Table S8.** Values (in kJ/mol) of London dispersive energy ( $-\Delta G_a^{sp}(T)$ ) of polar solvents adsorbed on monogal-Zn particles at different temperatures.

| T(K)          | <b>323.15</b> | <b>343.15</b> | <b>363.15</b> | <b>383.15</b> |
|---------------|---------------|---------------|---------------|---------------|
| DCM           | 2.354         | 1.965         | 1.426         | 0.854         |
| TCM           | 15.001        | 11.698        | 7.938         | 6.927         |
| Diethyl ether | 17.481        | 15.950        | 14.408        | 12.982        |
| THF           | 23.786        | 21.503        | 19.298        | 17.285        |
| Ethyl Acetate | 12.287        | 9.154         | 5.642         | 4.895         |
| Acetone       | 22.779        | 20.603        | 18.500        | 16.582        |
| Acetonitrile  | 19.104        | 16.905        | 14.694        | 12.454        |
| Toluene       | 22.246        | 20.175        | 18.138        | 16.267        |

**Table S9.** Values (in kJ/mol) of London dispersive energy ( $-\Delta G_a^d(T)$ ) of n-alkanes and polar solvents adsorbed on alumina particles at different temperatures.

| T (K)         | 323.15 | 343.15 | 363.15 | 383.15 |
|---------------|--------|--------|--------|--------|
| C6            | 21.488 | 20.220 | 19.103 | 18.422 |
| C7            | 24.393 | 22.954 | 21.685 | 20.912 |
| C8            | 28.356 | 26.682 | 25.208 | 24.310 |
| C9            | 30.852 | 29.030 | 27.427 | 26.449 |
| CCl4          | 20.481 | 19.272 | 18.207 | 17.559 |
| CH2Cl2        | 13.549 | 12.749 | 12.044 | 11.615 |
| CHCl3         | 16.684 | 15.699 | 14.832 | 14.303 |
| Ether         | 16.696 | 15.710 | 14.842 | 14.313 |
| THF           | 14.415 | 13.564 | 12.815 | 12.358 |
| Ethyl acetate | 16.467 | 15.495 | 14.639 | 14.117 |
| Toluene       | 20.200 | 19.008 | 17.958 | 17.318 |

**Table S10.** Values (in kJ/mol) of London dispersive energy ( $-\Delta G_a^{sp}(T)$ ) of polar solvents adsorbed on alumina particles at different temperatures.

| T(K)   | <b>323.15</b> | <b>343.15</b> | <b>363.15</b> | <b>383.15</b> |
|--------|---------------|---------------|---------------|---------------|
| CCl4   | 6.751         | 6.654         | 6.575         | 6.648         |
| CH2Cl2 | 38.808        | 36.648        | 34.670        | 32.613        |
| CHCl3  | 18.559        | 16.226        | 14.028        | 12.322        |
| Ether  | 41.085        | 39.144        | 37.268        | 35.790        |

|               |        |        |        |        |
|---------------|--------|--------|--------|--------|
| THF           | 40.532 | 38.377 | 36.371 | 34.878 |
| Ethyl acetate | 11.624 | 9.452  | 7.875  | 6.125  |
| Toluene       | 18.821 | 17.490 | 16.418 | 15.980 |

**Table S11.** Values (in kJ/mol) of London dispersive energy ( $-\Delta G_a^d(T)$ ) of n-alkanes and polar solvents adsorbed on TiO<sub>2</sub> particles at different temperatures.

| T (K)                           | <b>313.15</b> | <b>333.15</b> | <b>353.15</b> | <b>373.15</b> |
|---------------------------------|---------------|---------------|---------------|---------------|
| C6                              | 21.431        | 21.007        | 20.582        | 20.165        |
| C7                              | 24.274        | 23.793        | 23.313        | 22.841        |
| C8                              | 28.176        | 27.618        | 27.060        | 26.512        |
| C9                              | 30.623        | 30.017        | 29.410        | 28.815        |
| CH <sub>2</sub> Cl <sub>2</sub> | 13.681        | 13.410        | 13.139        | 12.873        |
| CHCl <sub>3</sub>               | 16.855        | 16.521        | 16.187        | 15.859        |
| THF                             | 14.252        | 13.970        | 13.688        | 13.410        |
| Ethyl Acetate                   | 16.401        | 16.077        | 15.752        | 15.433        |
| Acetone                         | 11.233        | 11.010        | 10.788        | 10.569        |
| Benzene                         | 17.813        | 17.460        | 17.108        | 16.761        |
| Nitromethane                    | 13.847        | 13.573        | 13.299        | 13.030        |
| Acetonitrile                    | 8.711         | 8.539         | 8.366         | 8.197         |

**Table S12.** Values (in kJ/mol) of London dispersive energy ( $-\Delta G_a^{sp}(T)$ ) of polar solvents adsorbed on TiO<sub>2</sub> particles at different temperatures.

| T(K)                            | <b>313.15</b> | <b>333.15</b> | <b>353.15</b> | <b>373.15</b> |
|---------------------------------|---------------|---------------|---------------|---------------|
| CH <sub>2</sub> Cl <sub>2</sub> | 2.546         | 1.924         | 1.254         | 0.723         |
| CHCl <sub>3</sub>               | 3.146         | 2.019         | 0.893         |               |
| THF                             | 7.620         | 6.620         | 5.620         | 4.620         |
| Ethyl Acetate                   | 3.979         | 2.417         | 0.857         | -0.710        |
| Acetone                         | 5.776         | 4.068         | 2.362         | 0.651         |
| Benzene                         | 5.564         | 4.199         | 2.834         | 1.463         |
| Nitromethane                    | 10.394        | 9.024         | 7.657         | 6.283         |
| Acetonitrile                    | 4.615         | 2.524         | 0.433         |               |

**Table S13.** Values (in kJ/mol) of London dispersive energy ( $-\Delta G_a^d(T)$ ) of n-alkanes and polar solvents adsorbed on untreated carbon fibers particles at different temperatures.

| T (K)            | <b>313.15</b> | <b>333.15</b> | <b>353.15</b> | <b>373.15</b> |
|------------------|---------------|---------------|---------------|---------------|
| C6               | 20.723        | 19.965        | 19.206        | 18.959        |
| C7               | 23.452        | 22.594        | 21.736        | 21.456        |
| C8               | 27.206        | 26.211        | 25.215        | 24.891        |
| C9               | 29.558        | 28.476        | 27.395        | 27.042        |
| CCl <sub>4</sub> | 20.133        | 19.396        | 18.659        | 18.419        |

|                                 |        |        |        |        |
|---------------------------------|--------|--------|--------|--------|
| CH <sub>2</sub> Cl <sub>2</sub> | 13.291 | 12.805 | 12.318 | 12.160 |
| CHCl <sub>3</sub>               | 16.378 | 15.779 | 15.179 | 14.984 |
| Ether                           | 15.944 | 15.361 | 14.777 | 14.587 |
| THF                             | 13.736 | 13.234 | 12.731 | 12.567 |
| C <sub>6</sub> H <sub>6</sub>   | 17.158 | 16.530 | 15.902 | 15.697 |
| Ethyl acetate                   | 15.851 | 15.271 | 14.691 | 14.502 |
| Acetone                         | 10.842 | 10.445 | 10.048 | 9.919  |

**Table S14.** Values (in kJ/mol) of London dispersive energy ( $-\Delta G_a^{sp}(T)$ ) of polar solvents adsorbed on untreated carbon fibers particles at different temperatures.

|                                 |        |        |        |        |
|---------------------------------|--------|--------|--------|--------|
| T(K)                            | 313.15 | 333.15 | 353.15 | 373.15 |
| CCl <sub>4</sub>                | 1.723  | 1.956  | 2.203  | 2.518  |
| CH <sub>2</sub> Cl <sub>2</sub> | 4.096  | 3.645  | 3.129  | 2.548  |
| CHCl <sub>3</sub>               | 14.829 | 13.537 | 11.761 | 8.193  |
| Ether                           | 2.112  | 1.633  | 1.131  | 0.546  |
| THF                             | 11.852 | 11.079 | 10.310 | 9.748  |
| C <sub>6</sub> H <sub>6</sub>   | 8.577  | 8.315  | 8.055  | 8.011  |
| Ethyl acetate                   | 9.500  | 9.251  | 9.019  | 8.975  |
| Acetone                         | 10.723 | 10.282 | 9.865  | 9.647  |

**Table S15.** Values (in kJ/mol) of London dispersive energy ( $-\Delta G_a^d(T)$ ) of n-alkanes and polar solvents adsorbed on oxidized carbon fibers at different temperatures.

|                                 |               |               |               |               |
|---------------------------------|---------------|---------------|---------------|---------------|
| T (K)                           | <b>313.15</b> | <b>333.15</b> | <b>353.15</b> | <b>373.15</b> |
| C6                              | 20.674        | 19.429        | 18.209        | 16.997        |
| C7                              | 23.396        | 21.988        | 20.607        | 19.236        |
| C8                              | 27.142        | 25.507        | 23.906        | 22.315        |
| C9                              | 29.488        | 27.712        | 25.972        | 24.244        |
| CCl <sub>4</sub>                | 20.085        | 18.875        | 17.690        | 16.513        |
| CH <sub>2</sub> Cl <sub>2</sub> | 13.260        | 12.461        | 11.679        | 10.902        |
| CHCl <sub>3</sub>               | 16.339        | 15.355        | 14.391        | 13.433        |
| Ether                           | 15.906        | 14.948        | 14.010        | 13.077        |
| THF                             | 13.704        | 12.879        | 12.070        | 11.267        |
| C <sub>6</sub> H <sub>6</sub>   | 17.117        | 16.086        | 15.076        | 14.073        |
| Ethyl acetate                   | 15.814        | 14.862        | 13.928        | 13.001        |
| Acetone                         | 10.816        | 10.165        | 9.526         | 8.892         |

**Table S16.** Values (in kJ/mol) of London dispersive energy ( $-\Delta G_a^{sp}(T)$ ) of polar solvents adsorbed on oxidized carbon fibers at different temperatures.

| T(K)          | 313.15 | 333.15 | 353.15 | 373.15 |
|---------------|--------|--------|--------|--------|
| CCl4          | 2.785  | 2.843  | 2.911  | 2.974  |
| CH2Cl2        | 10.546 | 9.952  | 9.379  | 8.800  |
| CHCl3         | 12.788 | 12.228 | 11.685 | 11.134 |
| Ether         | 7.399  | 6.965  | 6.548  | 6.124  |
| THF           | 17.020 | 15.878 | 14.753 | 13.623 |
| C6H6          | 10.429 | 9.943  | 9.473  | 8.995  |
| Ethyl acetate | 13.212 | 12.718 | 12.242 | 11.758 |
| Acetone       | 17.928 | 16.999 | 16.094 | 15.183 |
